# Supplementary material for: Enhanced activity of α-Fe2O3 for photocatalytic NO removal
Source: Royal Society of Chemistry journal article supplement (doi:10.1039/c6ra19167c), 2016-01-01
Supplement: c6ra19167c1.pdf [file c6ra19167c1.pdf]

## Supplementary Information

### **Enhanced activity of $\alpha$ -Fe<sub>2</sub>O<sub>3</sub> for the photocatalytic NO removal**

J. Balbuena,<sup>a</sup> M. Cruz-Yusta,<sup>a</sup> A. L. Cuevas,<sup>b</sup> M. Cruz López-Escalante,<sup>c</sup> F. Martín<sup>c</sup>, A. Pastor <sup>a</sup> and L. Sánchez <sup>a,\*</sup>

(a) Inorganic Chemistry Department, Campus de Rabanales, Universidad de Córdoba - Córdoba, 14071, Spain. [luis-sanchez@uco.es](mailto:luis-sanchez@uco.es)

(b) Unidad de Nanotecnología. Edificio de Bioinnovación. Universidad de Málaga - Málaga, 29071, Spain. [anLaura.cuevas@uma.es](mailto:anLaura.cuevas@uma.es)

(c) Chemical Engineering Department, Campus de Teatinos, Universidad de Málaga- Málaga, 29071, Spain. [marjim@uma.es](mailto:marjim@uma.es)

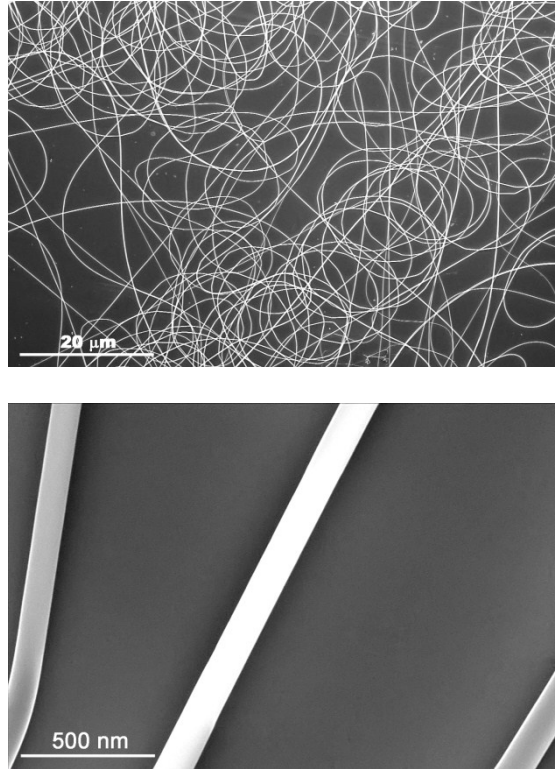

**Figure S1.** SEM images of as-spun Fe(III)/PVP nanofibers

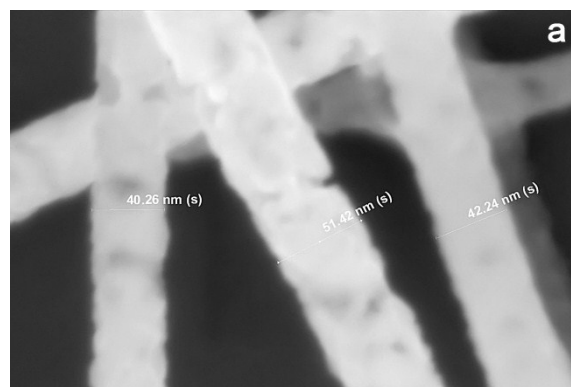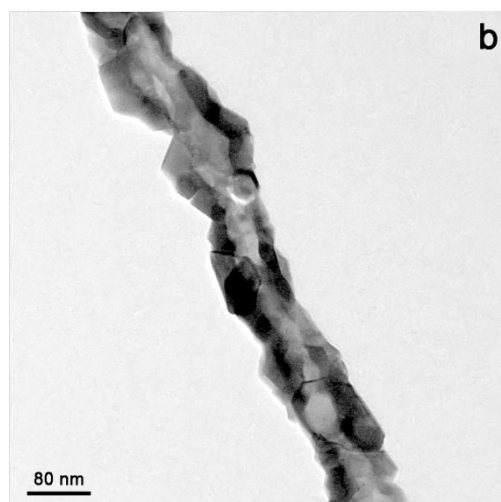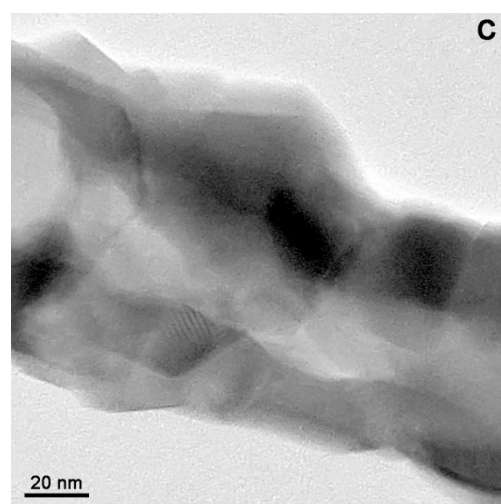

**Figure S2.** SEM (a) and HR-TEM (b, c) images obtained for HEF sample.

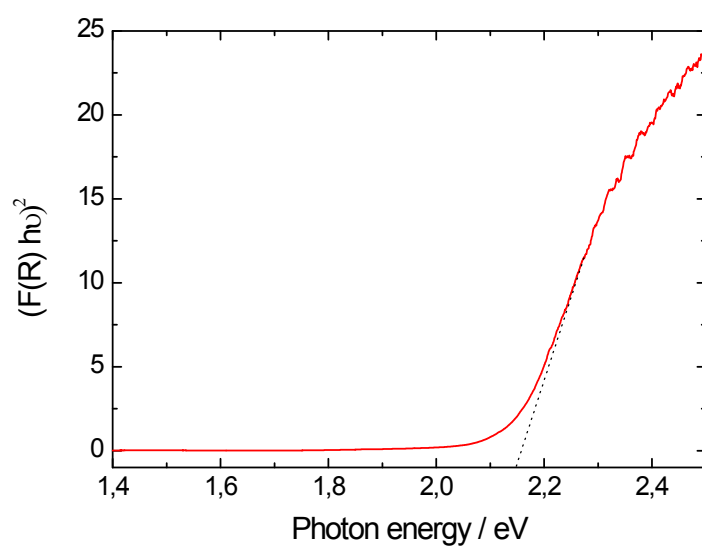

**Figure S3.** Kubelka-Munk transformed reflectance spectra of HEF.

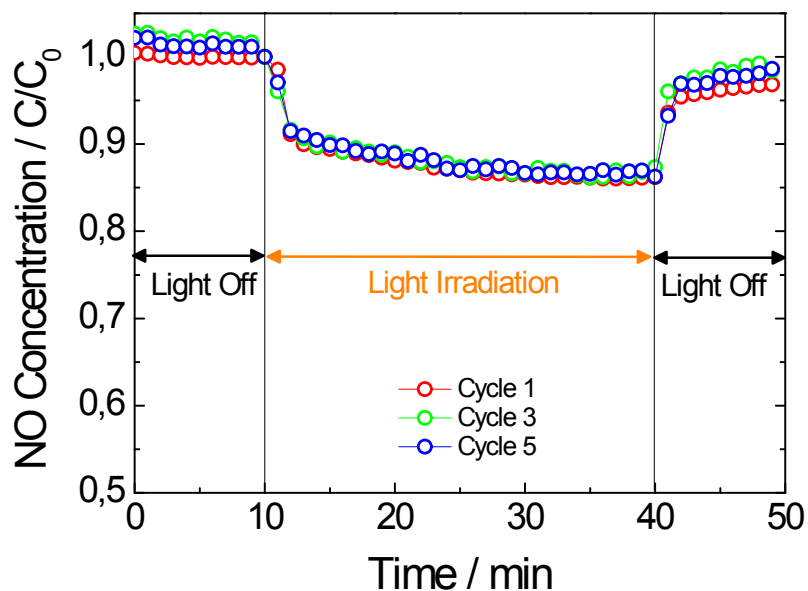

FIGURE S4. Concentration profiles obtained for HEF sample during successive experiments of photochemical degradation of NO gas under UV-vis light irradiation.

Successive additional cycling reactions were performed as preliminar evaluation of photocatalyst reuse. Between experiments, with the aim to eliminate the nitrite/nitrate compounds accumulated on surface, the photocatalyst was washed with distilled water, filtered and dried at 60 °C for 24 h.

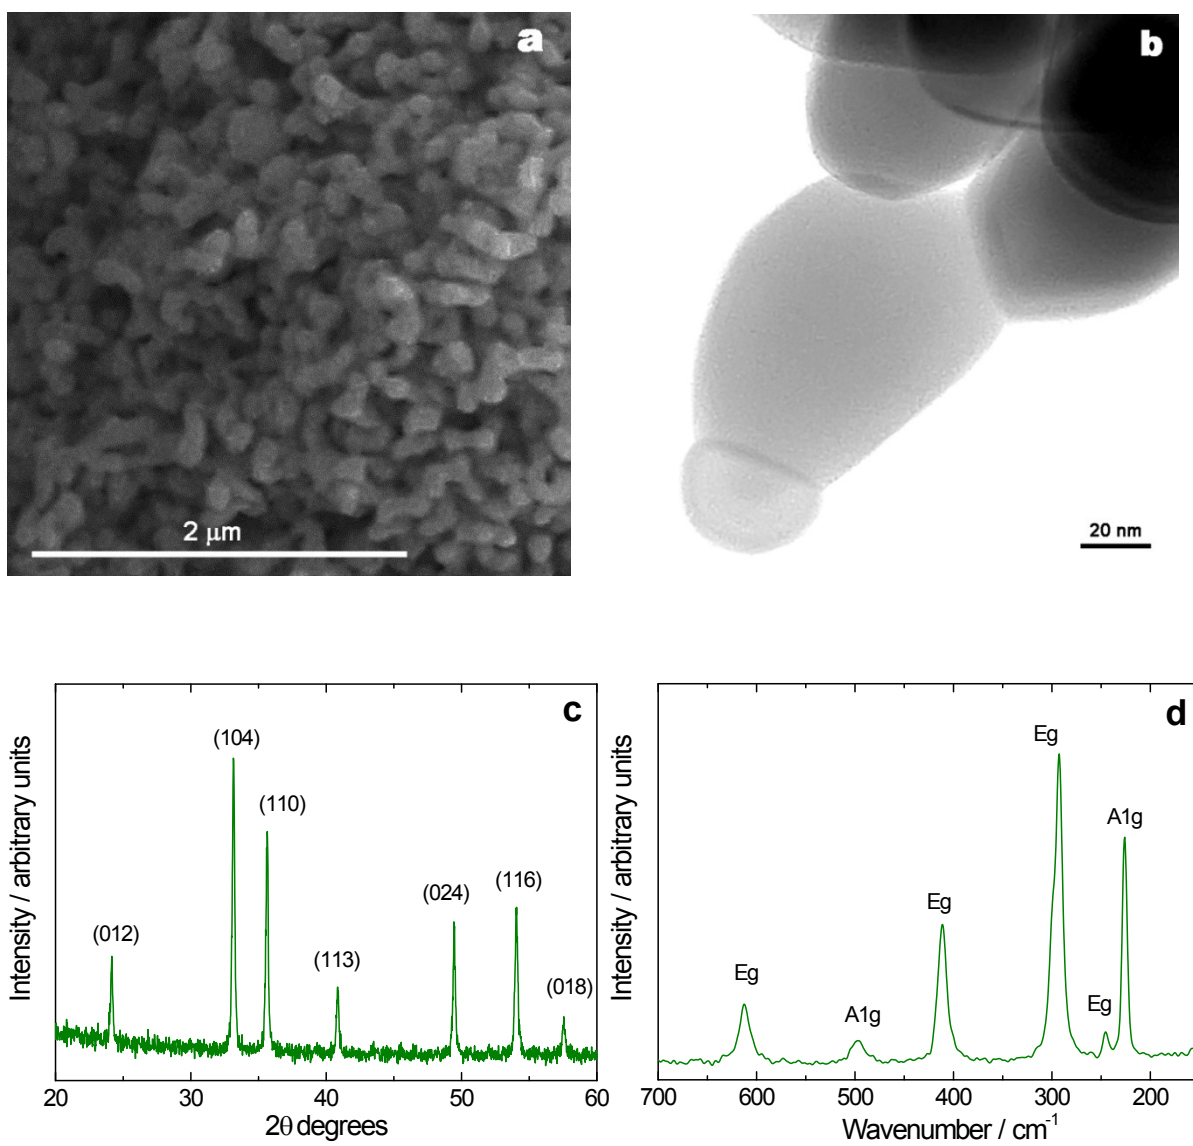

**Figure S5.** (a) SEM and (b) TEM images, (c) XRD and (d) Raman spectra of  $\alpha\text{-Fe}_2\text{O}_3$  nano-powders (HNP sample).

**Table 1.** Surface area and porosity parameters for  $\alpha$ -Fe<sub>2</sub>O<sub>3</sub> samples.

| <b>Samples</b>                                     | <b>HEF</b> | <b>HNP</b> |
|----------------------------------------------------|------------|------------|
| <b>Surface area / m<sup>2</sup>·g<sup>-1</sup></b> |            |            |
| <sup>a</sup> A <sub>BET</sub>                      | 22.13      | 9.14       |
| <sup>b</sup> A <sub>micropore</sub>                | 2.19       | 2.63       |
| <sup>b</sup> A <sub>External</sub>                 | 19.93      | 6.51       |
| <b>Pore Volume / cm<sup>3</sup>·g<sup>-1</sup></b> |            |            |
| <sup>c</sup> V <sub>Total</sub>                    | 0.0577     | 0.0172     |
| <sup>b</sup> V <sub>Micropore</sub>                | 0.0007     | 0.0013     |
| <sup>d</sup> V <sub>Mesopore</sub>                 | 0.0570     | 0.0159     |
| <b>Pore Size / Å</b>                               |            |            |
| <sup>e</sup> Pore Width                            | 104.23     | 75.35      |

<sup>a</sup> Determined by adsorption of N<sub>2</sub> at 77 K (BET eq. with A<sub>m</sub> = 0.162 nm<sup>2</sup>).

<sup>b</sup> Determined from the N<sub>2</sub> adsorption isotherm by t-plot method (Harkins and Jura eq.).

<sup>c</sup> Determined from the N<sub>2</sub> adsorption isotherm by taking volume adsorbed at P/P<sub>0</sub> = 0.995.

<sup>d</sup> Determined by V<sub>Total</sub> - V<sub>Micropore</sub>.

<sup>e</sup> Adsorption average pore width (4V/A by BET).
